# Supplementary material
Source: publisher figshare collection journal article supplement (https://sage.figshare.com/ndownloader/files/20028467)
Supplement: Supplementary file 1 [file 20028467]

**French Abstract**

**Résumé** :

L’audit et l'évaluation jouent un rôle crucial dans la fonction de surveillance des organisations. Les deux professions partagent des points communs qui ont conduit d’aucuns à appeler à une « surveillance renforcée » grâce à une collaboration plus étroite des deux fonctions. Notre expérience suggère que les évaluations conjointes peuvent aider à promouvoir une vision globale tridimensionnelle de la performance, qui examine à la fois les organisations internes et externes pour voir si les intrants correspondent aux extrants et aux résultats. Cependant, les différences tangibles de paradigme et d’approche doivent être examinées avant qu’une convergence des fonctions ne soit encouragée. La séparation des deux fonctions garantit leur indépendance, gage de la crédibilité des travaux des auditeurs et des évaluateurs.

**Mots clés** : évaluation, audit, performance, redevabilité, indépendance
